# Supplementary material
Source: HighWire-hosted journal article supplement (https://bibliotheek.ehb.be/content/12/1/e002541)
Supplement: inline-supplementary-material-1 [file inline-supplementary-material-1.pdf]

Supplementary Table 1- Search strategy

| Search strategy                                                                                                                                                                                                                                                                                                                                                                                                                                                                                                                                                                                                                                                                              |
|----------------------------------------------------------------------------------------------------------------------------------------------------------------------------------------------------------------------------------------------------------------------------------------------------------------------------------------------------------------------------------------------------------------------------------------------------------------------------------------------------------------------------------------------------------------------------------------------------------------------------------------------------------------------------------------------|
| <ol style="list-style-type: none"><li>1. (Severe asthma or difficult asthma or brittle asthma or difficult to treat asthma or uncontrolled asthma or poorly controlled asthma).ti,ab.</li><li>2. Exp moderate persistent/or exp severe persistent asthma/or exp asthma/or exp intrinsic asthma/</li><li>3. 1 or 2</li><li>4. (Adolesen* or young adult or young people or young person or youth or teenager).ti,ab.</li><li>5. Exp young adult/</li><li>6. 4 or 5</li><li>7. (Psychosocial or quality of life or social or psycholog*).ti,ab.</li><li>8. Psychosocial.mp. or exp psychosocial intervention/ or exp psychosocial care/</li><li>9. 7 or 8</li><li>10. 3 and 6 and 9.</li></ol> |
