# Supplementary material
Source: HighWire-hosted journal article supplement (https://bibliotheek.ehb.be/content/12/1/e002541)
Supplement: inline-supplementary-material-2 [file inline-supplementary-material-2.pdf]

Supplementary Table 2: JBI critical appraisal of included studies

| JBI Critical appraisal checklist questions <sup>17</sup>                                             | Included Studies             |                         |                             |                             |                            |                         |                         |                               |                               |                                   |                               |
|------------------------------------------------------------------------------------------------------|------------------------------|-------------------------|-----------------------------|-----------------------------|----------------------------|-------------------------|-------------------------|-------------------------------|-------------------------------|-----------------------------------|-------------------------------|
|                                                                                                      | Edgecombe 2010 <sup>21</sup> | Gabe 2002 <sup>22</sup> | Jonssoon 2017 <sup>23</sup> | Jonssoon 2014 <sup>26</sup> | Kintner 1997 <sup>24</sup> | Rhee 2022 <sup>27</sup> | Rhee 2007 <sup>40</sup> | Rich et al 2002 <sup>12</sup> | Rich et al 2000 <sup>20</sup> | Rydstrom et al 2005 <sup>28</sup> | Zaeh et al 2022 <sup>25</sup> |
| Q1. Is there congruity between the stated philosophical perspective and the research methodology?    | Yes                          | Yes                     | Yes                         | Yes                         | Yes                        | Yes                     | Yes                     | Yes                           | Yes                           | Yes                               | Yes                           |
| Q2. Is there congruity between the research methodology and the research question or objectives?     | Yes                          | Yes                     | Yes                         | Yes                         | Yes                        | Yes                     | Yes                     | Yes                           | Yes                           | Yes                               | Yes                           |
| Q3. Is there congruity between the research methodology and the methods used to collect data?        | Yes                          | Yes                     | Yes                         | Yes                         | Yes                        | Yes                     | Yes                     | Yes                           | Yes                           | Yes                               | Yes                           |
| Q4. Is there congruity between the research methodology and the representation and analysis of data? | Yes                          | Yes                     | Yes                         | Yes                         | Yes                        | Yes                     | Yes                     | Yes                           | Yes                           | Yes                               | Yes                           |
| Q5. Is there congruity between the research methodology and the interpretation of results?           | Yes                          | Yes                     | Yes                         | Yes                         | Yes                        | Yes                     | Yes                     | Yes                           | Yes                           | Yes                               | Yes                           |
| Q6. Is there a statement locating the researcher culturally or theoretically?                        | Unknown                      | Unknown                 | Unknown                     | Unknown                     | Unknown                    | Unknown                 | Unknown                 | No                            | No                            | Unknown                           | Unknown                       |
| Q7. Is the influence of the researcher on the research, and vice-versa, addressed?                   | Unknown                      | No                      | Unknown                     | Unknown                     | Unknown                    | Unknown                 | Unknown                 | Unknown                       | No                            | Yes                               | Yes                           |

Supplementary Table 2: JBI critical appraisal of included studies

|                                                                                                                                                     |     |     |     |     |     |     |     |     |     |         |     |
|-----------------------------------------------------------------------------------------------------------------------------------------------------|-----|-----|-----|-----|-----|-----|-----|-----|-----|---------|-----|
| Q8. Are participants, and their voices, adequately represented?                                                                                     | Yes     | Yes |
| Q9. Is the research ethical according to current criteria or, for recent studies, and is there evidence of ethical approval by an appropriate body? | Yes | Unknown | Yes |
| Q10. Do the conclusions drawn in the research report flow from the analysis, or interpretation, of the data?                                        | Yes     | Yes |
