# Supplementary material
Source: HighWire-hosted journal article supplement (https://bibliotheek.ehb.be/content/12/1/e002541)
Supplement: inline-supplementary-material-3 [file inline-supplementary-material-3.pdf]

Supplementary table 3: Overview of the phenomena of interest, methods of investigation & identified themes of included studies

| Author                       | Theoretical approach                | Phenomena of interest                                                 | Methods including interview questions                                                                                                                                                                                                                                                   | Analysis                                                                                                    | Identified themes                                                                                                                                                                                                                                                                                                                                                                                                                  |
|------------------------------|-------------------------------------|-----------------------------------------------------------------------|-----------------------------------------------------------------------------------------------------------------------------------------------------------------------------------------------------------------------------------------------------------------------------------------|-------------------------------------------------------------------------------------------------------------|------------------------------------------------------------------------------------------------------------------------------------------------------------------------------------------------------------------------------------------------------------------------------------------------------------------------------------------------------------------------------------------------------------------------------------|
| Edgecombe 2010 <sup>21</sup> | Qualitative                         | The health experience of young adults with uncontrolled severe asthma | <p>In-depth Semi-structured interviews.</p> <p>Questions were open ended and flexible within the context of participant discourse.</p> <p>Example questions are not provided within the paper.</p>                                                                                      | Transcribed interviews were analysed using a thematic approach of iterative process of continual comparison | <ul style="list-style-type: none"><li>• Medications &amp; adherence</li><li>• Responsibility</li><li>• Experience &amp; experimentation</li><li>• Identity &amp; interaction with others</li><li>• Activities &amp; hobbies</li><li>• Interaction with healthcare professionals</li></ul>                                                                                                                                          |
| Gabe 2002 <sup>22</sup>      | Qualitative- sociological approach. | The lived experience of young people with moderate and severe asthma. | <p>In-depth interviews</p> <p>A topic guide was used to focus the interview on the meaning of asthma to participants, the onset of asthma &amp; daily asthma management in context of lives, school family and friends.</p> <p>Example questions are not provided within the paper.</p> | Transcribed interviews were thematically analysed using “Ethnograph” a qualitative software package         | <ul style="list-style-type: none"><li>• Experiencing asthma</li><li>• Symptoms of asthma</li><li>• Restrictions to activities</li><li>• Explaining asthma</li><li>• Management of asthma</li><li>• Using medications and health services</li><li>• Acting normally</li><li>• Self-reliance as a coping strategy</li><li>• Staying calm</li><li>• Seeking lay help</li><li>• Help from friends</li><li>• Help from adults</li></ul> |

Supplementary table 3: Overview of the phenomena of interest, methods of investigation & identified themes of included studies

|                            |                      |                                                           |                                                                                                                                                                                                                                                                                                                                                                                                                                                                                                                                                                                                                                                                                   |                                                                             |                                                                                                                                                                                                   |
|----------------------------|----------------------|-----------------------------------------------------------|-----------------------------------------------------------------------------------------------------------------------------------------------------------------------------------------------------------------------------------------------------------------------------------------------------------------------------------------------------------------------------------------------------------------------------------------------------------------------------------------------------------------------------------------------------------------------------------------------------------------------------------------------------------------------------------|-----------------------------------------------------------------------------|---------------------------------------------------------------------------------------------------------------------------------------------------------------------------------------------------|
| Jonsson 2017 <sup>23</sup> | Qualitative approach | Adolescents experience of daily life with asthma          | <p>Semi-structured interviews</p> <p>Questions included<br/>“How does asthma affect you? How does it feel? What do you do when asthma affects you? How do you handle the situation?<br/>How does asthma affect your relationships with friends, teachers, parents, coaches, and/or relatives?<br/>Describe meeting with healthcare professionals.<br/>What was it like when you became ill with asthma?<br/>What is it like now?<br/>What are your thoughts about the future?<br/>How is your asthma when you are exposed to: indoor air, outdoor air, sports, leisure, perfumes, tobacco, cold, heat, forests, nature?<br/>What is it like to be an adolescent with asthma?”</p> | The transcribed interviews were analysed using Systematic text condensation | <ul style="list-style-type: none"><li>• Insight and understanding</li><li>• Asthma not the focus of daily life</li><li>• Being acknowledged</li><li>• Being affected by asthma symptoms</li></ul> |
| Jonsson 2014 <sup>26</sup> | Qualitative approach | Experiences of adolescents and parents living with asthma | <p>Focus group interviews with adolescents and parents.</p> <p>(parental experiences/data omitted from analysis in this systematic review)</p>                                                                                                                                                                                                                                                                                                                                                                                                                                                                                                                                    | The transcribed interviews were analysed using Systematic text condensation | <ul style="list-style-type: none"><li>• Strategies</li><li>• Frustrations</li><li>• Expectations</li></ul>                                                                                        |

Supplementary table 3: Overview of the phenomena of interest, methods of investigation & identified themes of included studies

|                            |                         |                                                                                    |                                                                                                                                                                                                                                                                                    |                                                                                    |                                                                                                                                                                                                                                |
|----------------------------|-------------------------|------------------------------------------------------------------------------------|------------------------------------------------------------------------------------------------------------------------------------------------------------------------------------------------------------------------------------------------------------------------------------|------------------------------------------------------------------------------------|--------------------------------------------------------------------------------------------------------------------------------------------------------------------------------------------------------------------------------|
|                            |                         |                                                                                    | Questions to participants included:<br>“What experiences have you had relating to your meeting healthcare professionals?<br>How do you take care of your asthma?<br>Explain what it is like to live with asthma?<br>Have you received any support?<br>Do you require any support?” |                                                                                    |                                                                                                                                                                                                                                |
| Kintner 1997 <sup>24</sup> | Phenomenological        | To explore the process of acceptance of diagnosis of adolescents with asthma.      | In-depth interviews<br><br>Open ended question was used asking participants to describe their lived experience of accepting their diagnosis                                                                                                                                        | Data analysis was undertaken using an adaptation of Colaizzi approach.             | <ul style="list-style-type: none"><li>• Initial awareness</li><li>• Acknowledgement</li><li>• Gaining Knowledge</li><li>• Resigned acceptance</li><li>• Reasoning</li><li>• Drawing conclusions</li><li>• Acceptance</li></ul> |
| Rhee 2022 <sup>27</sup>    | Qualitative descriptive | To explore the experiences and perspectives of adolescents growing up with asthma. | Focus groups and interviews<br><br>Semi structured questions included<br>“What is it like to live with asthma?<br>Have you thought about becoming an adult while still having asthma?                                                                                              | Interview transcripts were analysed using qualitative content analysis techniques. | <ul style="list-style-type: none"><li>• Living with asthma</li><li>• Becoming adults with asthma</li><li>• Asthma self-management</li><li>• Parental involvement in asthma management</li></ul>                                |

Supplementary table 3: Overview of the phenomena of interest, methods of investigation & identified themes of included studies

|                               |                         |                                                                                         |                                                                                                                                                                                                                                                                                                        |                                                                                               |                                                                                                                                                                                                                                 |
|-------------------------------|-------------------------|-----------------------------------------------------------------------------------------|--------------------------------------------------------------------------------------------------------------------------------------------------------------------------------------------------------------------------------------------------------------------------------------------------------|-----------------------------------------------------------------------------------------------|---------------------------------------------------------------------------------------------------------------------------------------------------------------------------------------------------------------------------------|
|                               |                         |                                                                                         | Has anyone discussed with you about being independent in your asthma care?<br>What are your concerns in relation to transition?<br>What role do you play currently in your asthma management?<br>How much do you communicate with your provider?<br>How confident are you in your asthma management??” |                                                                                               | <ul style="list-style-type: none"><li>• Communication wi.th providers</li></ul>                                                                                                                                                 |
| Rhee 2007 <sup>40</sup>       | Qualitative descriptive | To explore the psychosocial experience and coping strategies of adolescents with asthma | Focus group interviews<br><br>Questions included<br>“What is it like to have asthma?<br>What kinds of things does asthma stop you doing that you want to do?<br>When is not such a bad thing to have asthma?”                                                                                          | Transcripts were analysed using thematic analysis                                             | <ul style="list-style-type: none"><li>• General perceptions</li><li>• Emotional reactions</li><li>• Other’s reactions perceived by participants</li><li>• Coping strategies</li></ul>                                           |
| Rich et al 2002 <sup>12</sup> | Visual anthropology     | To examine the explanation models of illness in children and adolescents with asthma    | Face-to-face interviews and visual illness narratives.<br><br>Open-ended questions provided to participants included<br>“What is asthma<br>Why do I have asthma?                                                                                                                                       | Data analysis was undertaken using theoretical frameworks of anthropology and grounded theory | <ul style="list-style-type: none"><li>• The nature of asthma</li><li>• The origin of asthma</li><li>• Asthma triggers</li><li>• Lifestyle limitations</li><li>• Control</li><li>• Medications</li><li>• Fear of death</li></ul> |

Supplementary table 3: Overview of the phenomena of interest, methods of investigation & identified themes of included studies

|                                   |                                                  |                                                                                                                   |                                                                                                                                                                                                                                                                                                |                                                                                               |                                                                                                                                                                                                                                                                   |
|-----------------------------------|--------------------------------------------------|-------------------------------------------------------------------------------------------------------------------|------------------------------------------------------------------------------------------------------------------------------------------------------------------------------------------------------------------------------------------------------------------------------------------------|-----------------------------------------------------------------------------------------------|-------------------------------------------------------------------------------------------------------------------------------------------------------------------------------------------------------------------------------------------------------------------|
|                                   |                                                  |                                                                                                                   | How much control do I have over my asthma<br>What gets in the way of my asthma improving?"                                                                                                                                                                                                     |                                                                                               | <ul style="list-style-type: none"><li>• Prognosis</li></ul>                                                                                                                                                                                                       |
| Rich et al 2000 <sup>20</sup>     | Visual anthropology                              | To explore the experience of living with and managing asthma in children and adolescents                          | Face-to-face interviews and visual illness narratives.<br>No questions were provided in this paper                                                                                                                                                                                             | Data analysis was undertaken using theoretical frameworks of anthropology and grounded theory | <ul style="list-style-type: none"><li>• Disability</li><li>• Denial</li><li>• Self-comforting</li><li>• Specialness</li></ul>                                                                                                                                     |
| Rydstrom et al 2005 <sup>28</sup> | Grounded theory                                  | To understand how teenagers with asthma cope with everyday life around their disease                              | Participant observation and interviews.<br><br>Interview questions were not provided within the paper, however alluded to Charmaz’s grounded theory and informal reflective questioning                                                                                                        | Data analysis was undertaken using grounded theory (open, selective and theoretical coding).  | <ul style="list-style-type: none"><li>• Keeping a distance to the disease</li><li>• Challenging the disease</li><li>• Taking the disease into consideration</li></ul>                                                                                             |
| Zaeh et al 202 <sup>25</sup>      | Socio-ecological, qualitative descriptive design | To explore the impact of transition upon medication adherence and asthma control in adolescents and young adults. | Semi structured interviews with adolescents, young adults and carers (carers experiences/data omitted from analysis in this systematic review)<br><br>Open-ended questions surrounding medication, factors which influenced medication adherence and adherence support and intervention needs. | Data analysis was undertaken using a qualitative descriptive design and thematic analysis     | <ul style="list-style-type: none"><li>• Taking responsibility for asthma management</li><li>• Understanding of asthma condition and severity</li><li>• Embarrassment about asthma medication use</li><li>• Life demands affecting medication adherence.</li></ul> |
